# Supplementary material for: Interleukin-17A-promoted MSC2 polarization related with new bone formation of ankylosing spondylitis
Source: PubMed Central journal article supplement (PMC5722540; doi:10.18632/oncotarget.20823), 2017-09-11
Supplement: oncotarget-08-96993-s001.pdf [file oncotarget-08-96993-s001.pdf]

# Interleukin-17A-promoted MSC2 polarization related with new bone formation of ankylosing spondylitis

## SUPPLEMENTARY MATERIALS

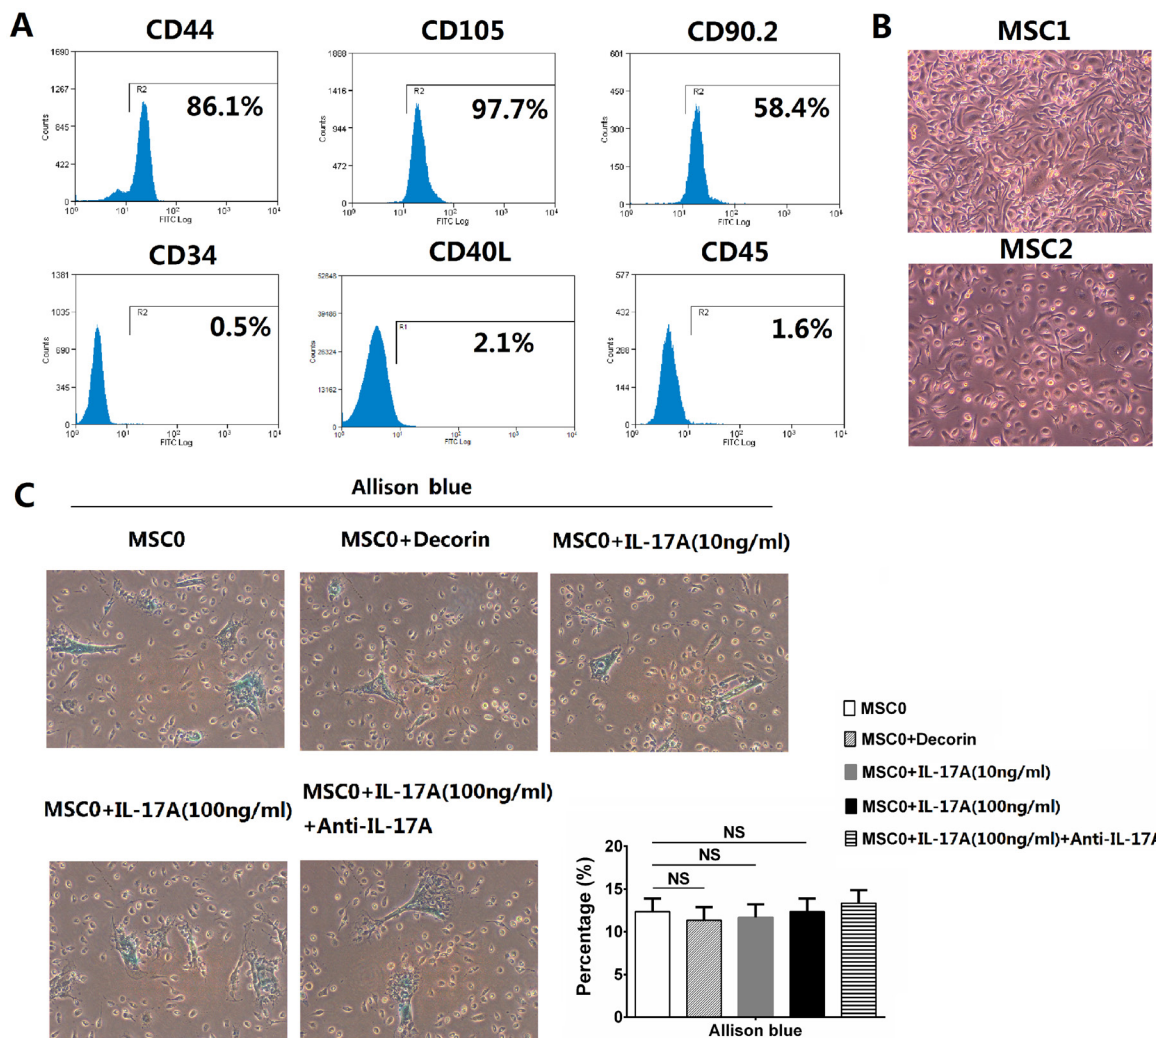

Supplementary Figure 1: Characteristics of MSC1 and MSC2 polarizations primed by low and high level of IL-17A, respectively. Values are the mean ± SEM (all  $n = 3$ ), NS= no significance. (A) Flow cytometry of MSC0. (B) Microscopic view of MSC1 and MSC2 (original magnification 100×). (C) Chondrocytic differentiation of murine MSCs.

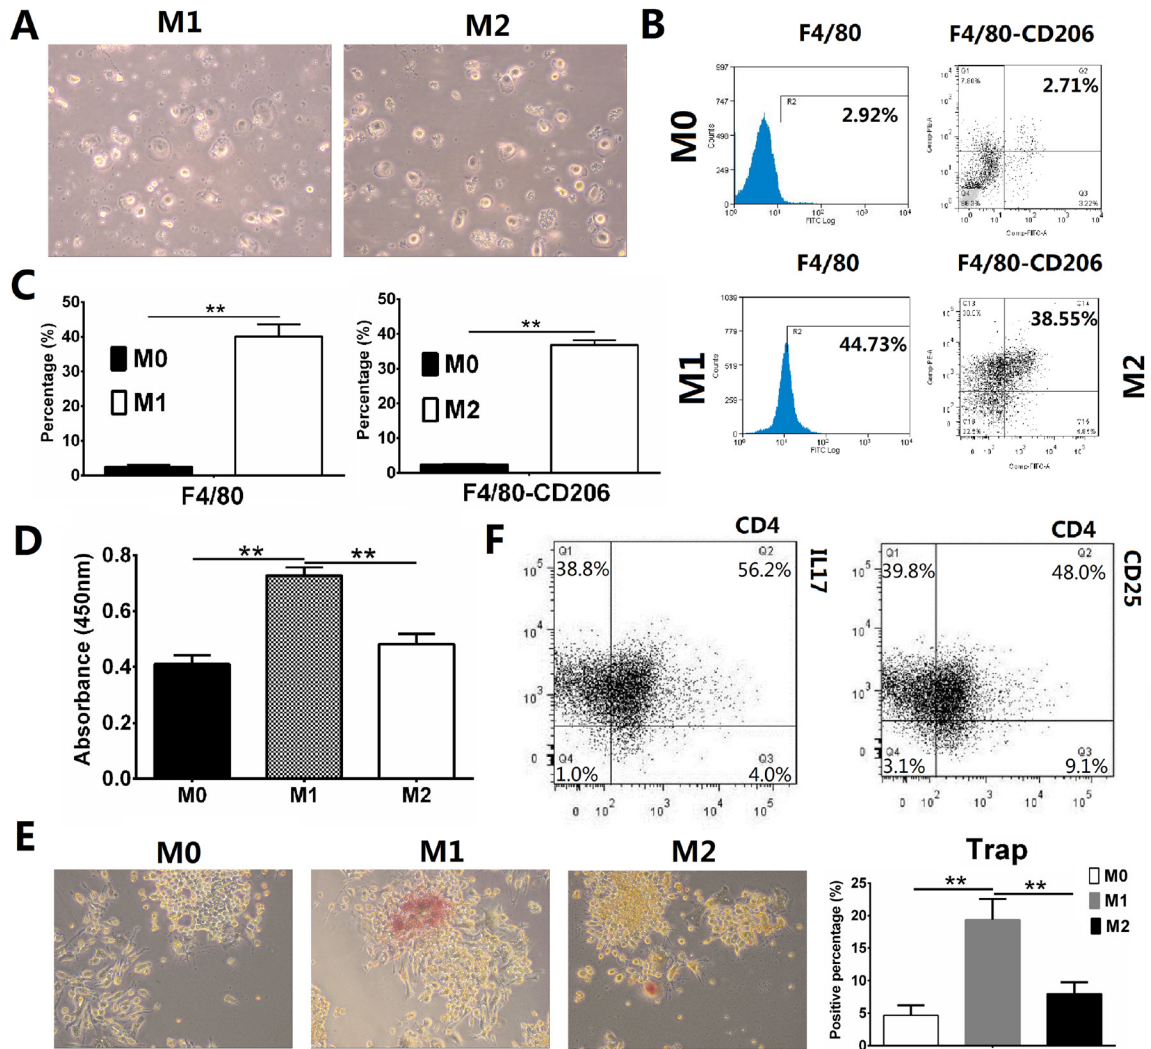

**Supplementary Figure 2: Characteristics of polarized M1, M2, Th17 and Treg.** Values are the mean  $\pm$  SEM (all  $n = 3$ ). \* $P < 0.05$ , \*\* $P < 0.01$ . (A) Microscopic view of LPS-challenged murine macrophage (M1) and IL-4-challenged murine macrophage (M2) (Original magnification 100 $\times$ ). (B–C) Flow cytometry of M1 and M2. (D) Cellular phagocytosis assay for M0, M1 and M2. (E) TRAP staining analysis for M0, M1 and M2. (F) Flow cytometry of Th17 and Treg.

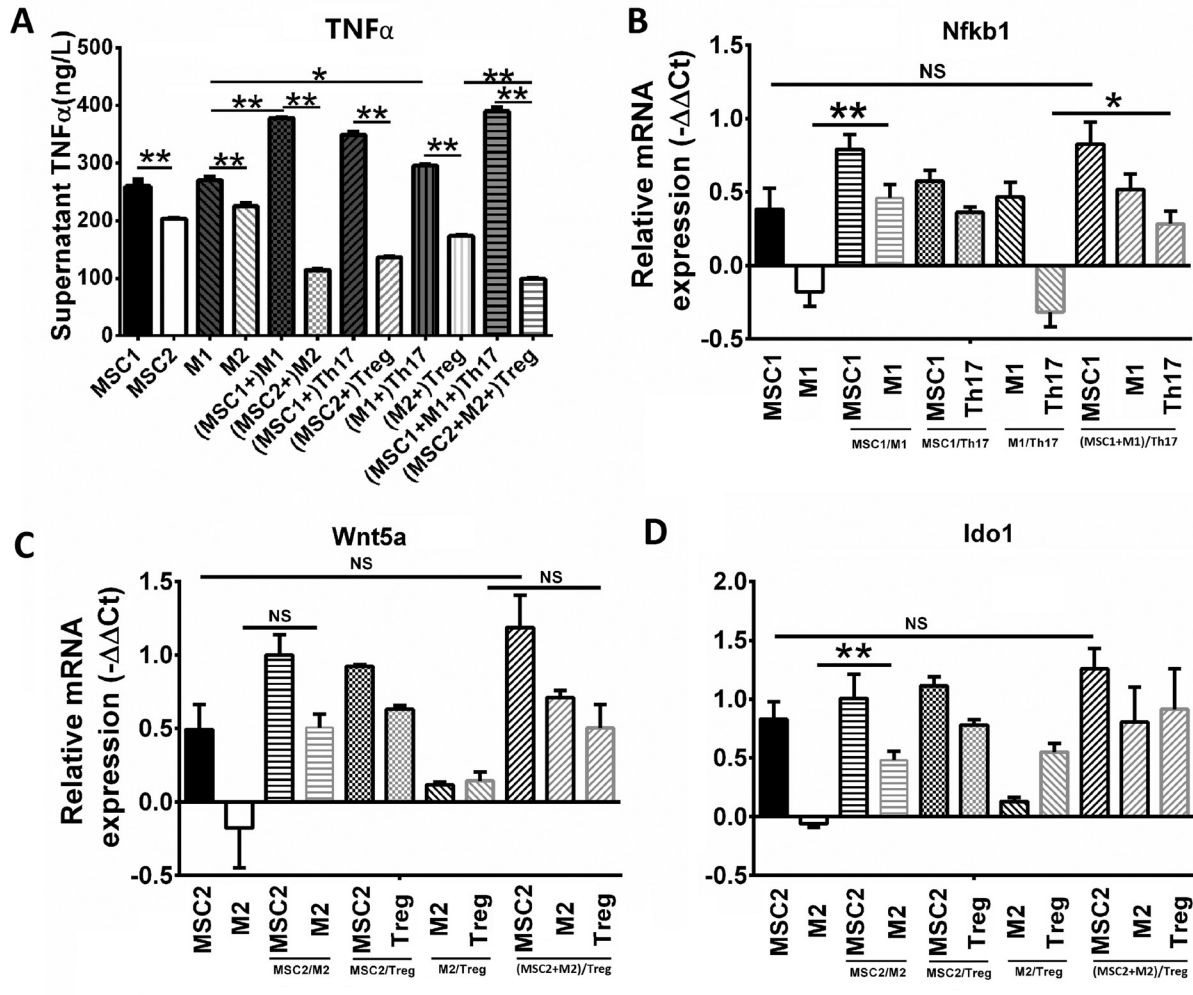

**Supplementary Figure 3: Traditional signals related with MSC1/2 polarizations promoting M1/2 and Th17/Treg polarizations, respectively.** Values are the mean  $\pm$  SEM (all  $n = 3$ ), NS = no significance. \* $P < 0.05$ , \*\* $P < 0.01$ . (A) The analysis for supernatant TNF $\alpha$  in Elisa. (B–D) The relative mRNA expression of Nfkb1 (B), Wnt5a (C) and Ido1 (D) in RT-qPCR.

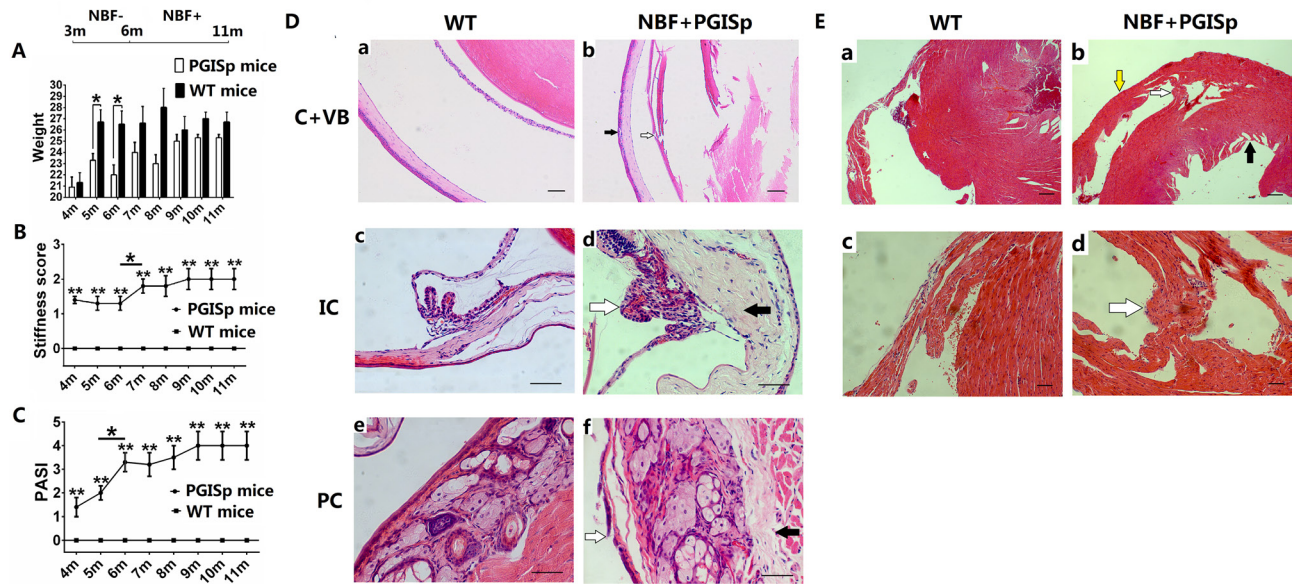

**Supplementary Figure 4: PGISp mice with new bone formation showed extensive tissue hyperplasia in chronic inflammatory damage.** Values are the mean  $\pm$  SEM (all  $n = 3$ ). \* $P < 0.05$ , \*\* $P < 0.01$ . (A–C) NBF+PGISp mice showed different feature in weight (A), Stiffness score (B) and PASI (C) compared to NBF-PGISp mice. (D–E) Tissue hyperplasia of NBF+PGISp mice in eyes (D) and heart (E) by HE staining.

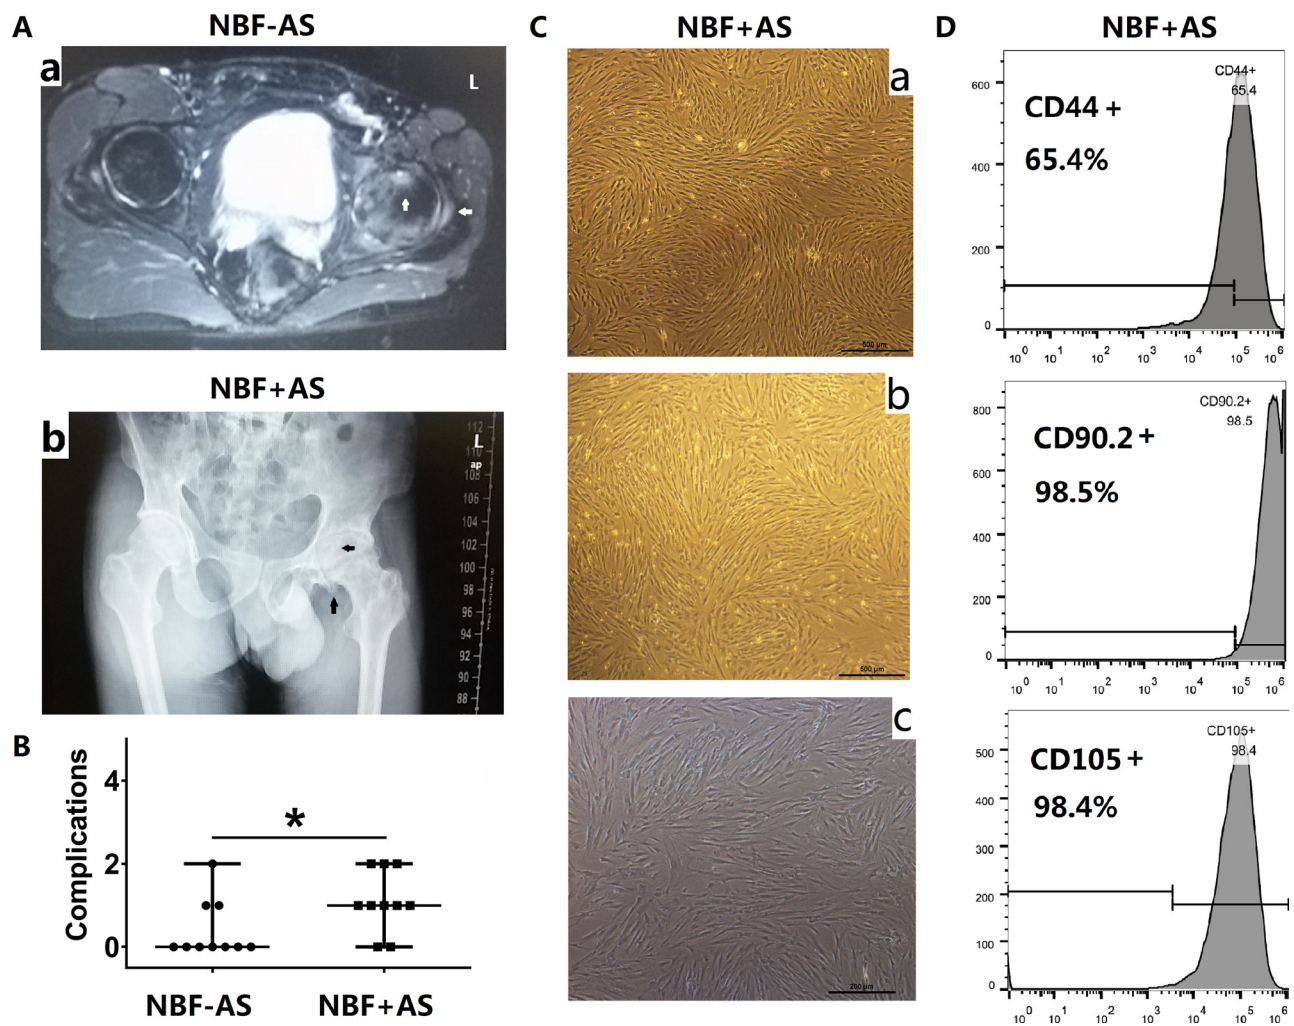

**Supplementary Figure 5: Characteristics of AS patients with new bone formation.** Values are the mean  $\pm$  SEM (both  $n = 10$ ). \* $P < 0.05$ . (A) The radiological image of pelvis of an AS patient. (B) Complications of NBF- and NBF+AS patients. (C–D) Microscopic view (C) and flow cytometry (D) of MSCs from a NBF+AS patient.

**Supplementary Table 1: Baseline characteristics of AS patients and healthy donors**

| <b>Items</b>                                      | <b>Group NBF-AS<br/>(N = 10)</b> | <b>Group NBF+AS<br/>(N = 10)</b> | <b>Group Healthy<br/>Donors (N = 10)</b> |
|---------------------------------------------------|----------------------------------|----------------------------------|------------------------------------------|
| Age, mean ( $\pm$ sem) years                      | 36.4 ( $\pm$ 2.5)                | 43.8 ( $\pm$ 3.7)                | 39.5 ( $\pm$ 4.6)                        |
| Sex, male (%)                                     | 8 (80%)                          | 9 (90%)                          | 6 (60%)                                  |
| Marriage (%)                                      | 100%                             | 80%                              | 80%                                      |
| Degree of education, median (range)               | 2 (1–4)                          | 3 (1–4)                          | 3 (1–4)                                  |
| Place of birth, Southern (%)                      | 80%                              | 80%                              | 80%                                      |
| Precipitating factors (%)                         | 20%                              | 20%                              |                                          |
| Family history (%)                                | 30%                              | 20%                              |                                          |
| Age of initial pain, mean ( $\pm$ sem) years      | 18.3 ( $\pm$ 1.8)                | 26.4 ( $\pm$ 4.5)                |                                          |
| Age of initial ankylosis, mean ( $\pm$ sem) years | 28.0 (1.3)                       | 35.4 (3.9)                       |                                          |
| Duration of disease, mean ( $\pm$ sem) years      | 18.1 (3.2)                       | 17.4 (3.2)                       |                                          |
| Accompanied diseases*, median (range)             | 1(1–4)                           | 1 (1–4)                          |                                          |
| ESR (mm/H)                                        | 16.7 ( $\pm$ 2.3)                | 19.5 ( $\pm$ 3.1)                |                                          |
| CRP (mg/L)                                        | 19.6 ( $\pm$ 7.2)                | 12.6 ( $\pm$ 2.1)                |                                          |

\*Including hip or knee arthritis, dactylitis, enthesopathy, psoriasis, uveitis, inflammatory bowel disease or cardiovascular diseases.

**Supplementary Table 2: List of primers and antibodies.** See Supplementary\_Table\_2

**Supplementary Video 1: A NBF-PGISp mouse.** See Supplementary\_Video\_1

**Supplementary Video 2: A NBF+PGISp mouse.** See Supplementary\_Video\_2

**Supplementary Video 3: NBF+PGISp and wild-type mice in long term observation.** See Supplementary\_Video\_3
